# Supplementary material for: Probing the interactions of GlcNH2 with boric acid via NMR spectroscopy
Source: Royal Society of Chemistry journal article supplement (doi:10.1039/d1cp01795k), 2021-01-01
Supplement: d1cp01795k1.pdf [file d1cp01795k1.pdf]

## Supporting Information

Table S1 Summary of peaks diffusion coefficients of free GlcNH<sub>2</sub> and boron complex  
D (the diffusion coefficient) is given in 10<sup>-10</sup> m<sup>2</sup> s<sup>-1</sup>

| Complex                                               |             |             |             | average | standard<br>deviation |
|-------------------------------------------------------|-------------|-------------|-------------|---------|-----------------------|
| $\delta(^1\text{H})$ (ppm)                            | 8.310~8.138 | 5.371~5.257 | 3.984~3.776 |         |                       |
| D (10 <sup>-10</sup> m <sup>2</sup> s <sup>-1</sup> ) | 1.323       | 1.322       | 1.308       | 1.317   | 0.008                 |
| Free                                                  |             |             |             | average |                       |
| $\delta(^1\text{H})$ (ppm)                            | 8.138~7.981 | 5.257~5.171 | 3.776~3.433 |         |                       |
| D (10 <sup>-10</sup> m <sup>2</sup> s <sup>-1</sup> ) | 1.342       | 1.354       | 1.339       | 1.345   | 0.008                 |

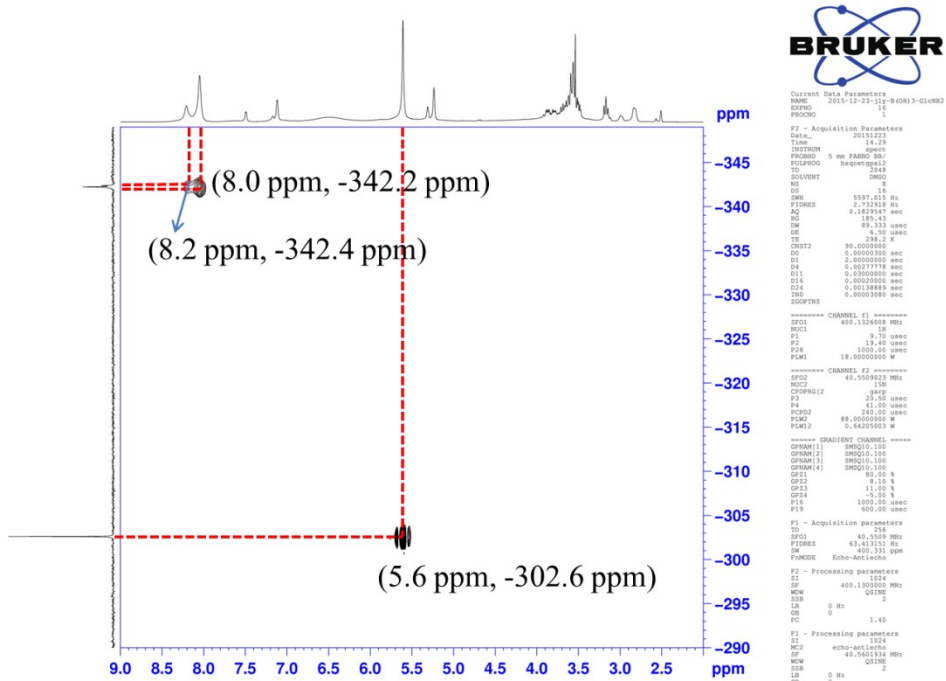

Fig.S1 2D  $^1\text{H}$ - $^{15}\text{N}$  HSQC spectra recorded on the solution of  $\text{GlcNH}_2$  with equimolar ratio of boric acid including external reference signal

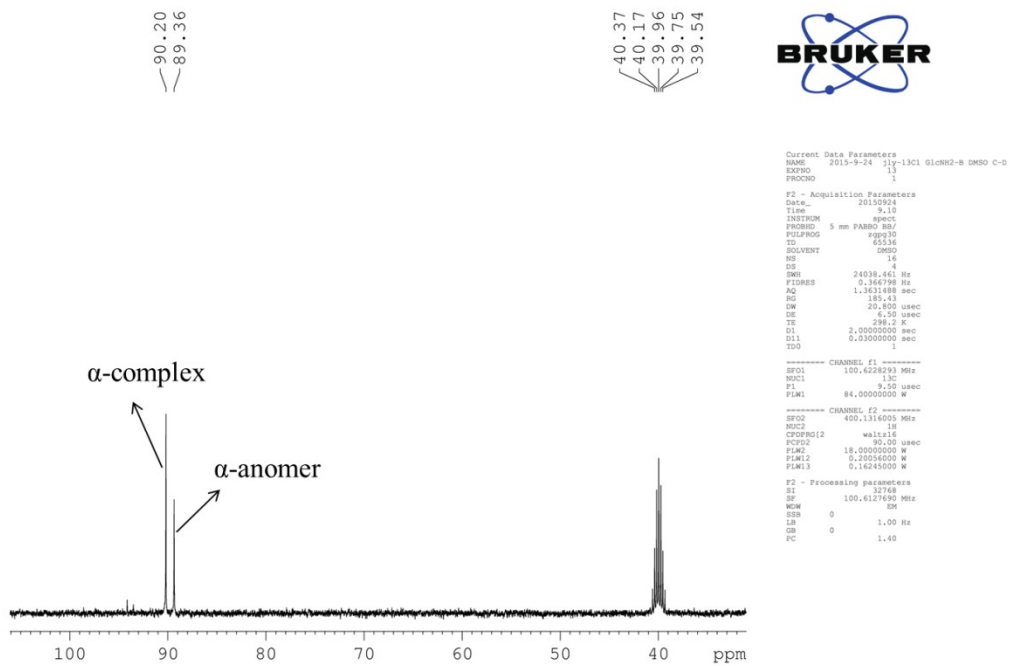

Fig. S2 The  $^{13}\text{C}$  NMR spectra of 0.016 mmol  $^{13}\text{C}_1$ -labeled GlcNH<sub>2</sub> with 0.048 mmol B(OH)<sub>3</sub> in DMSO-d<sub>6</sub>.

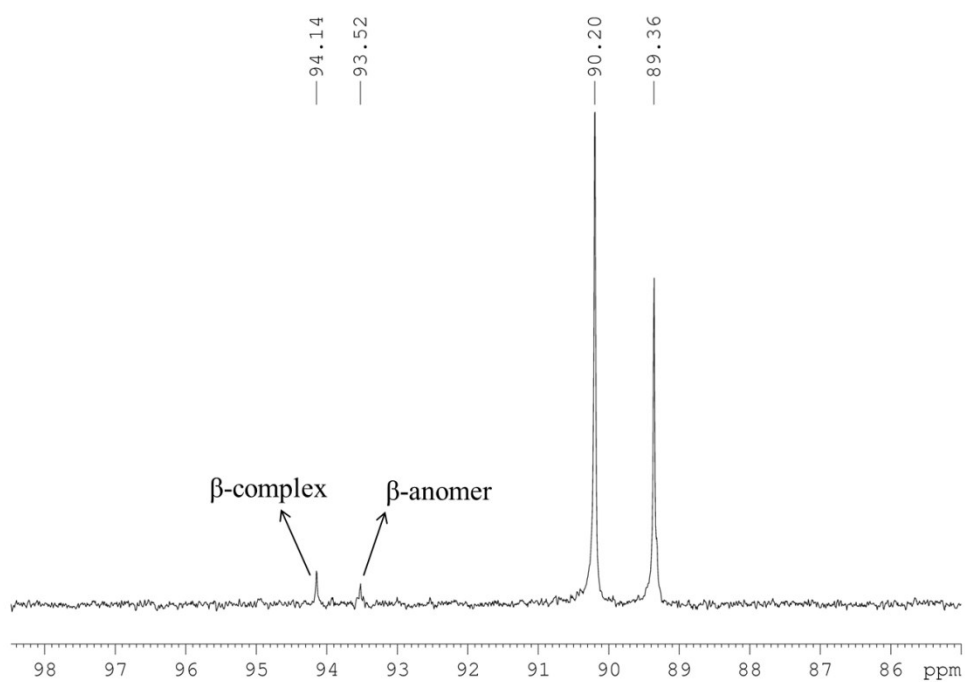

Fig.S3 The  $^{13}\text{C}$  NMR spectra of 0.016 mmol  $^{13}\text{C}_1$ -labeled  $\text{GlcNH}_2$  with 0.048 mmol  $\text{B(OH)}_3$  in  $\text{DMSO-d}_6$  after local magnification
